# Supplementary material for: Milk and Fermented Milk Intake and Parkinson’s Disease: Cohort Study
Source: MDPI journal article supplement (doi:10.3390/nu12092763), 2020-09-10
Supplement: s1 [file s1]

**Figure S1.** The Swedish Mammography Cohort (SMC) and the Cohort of Swedish Men (COSM)

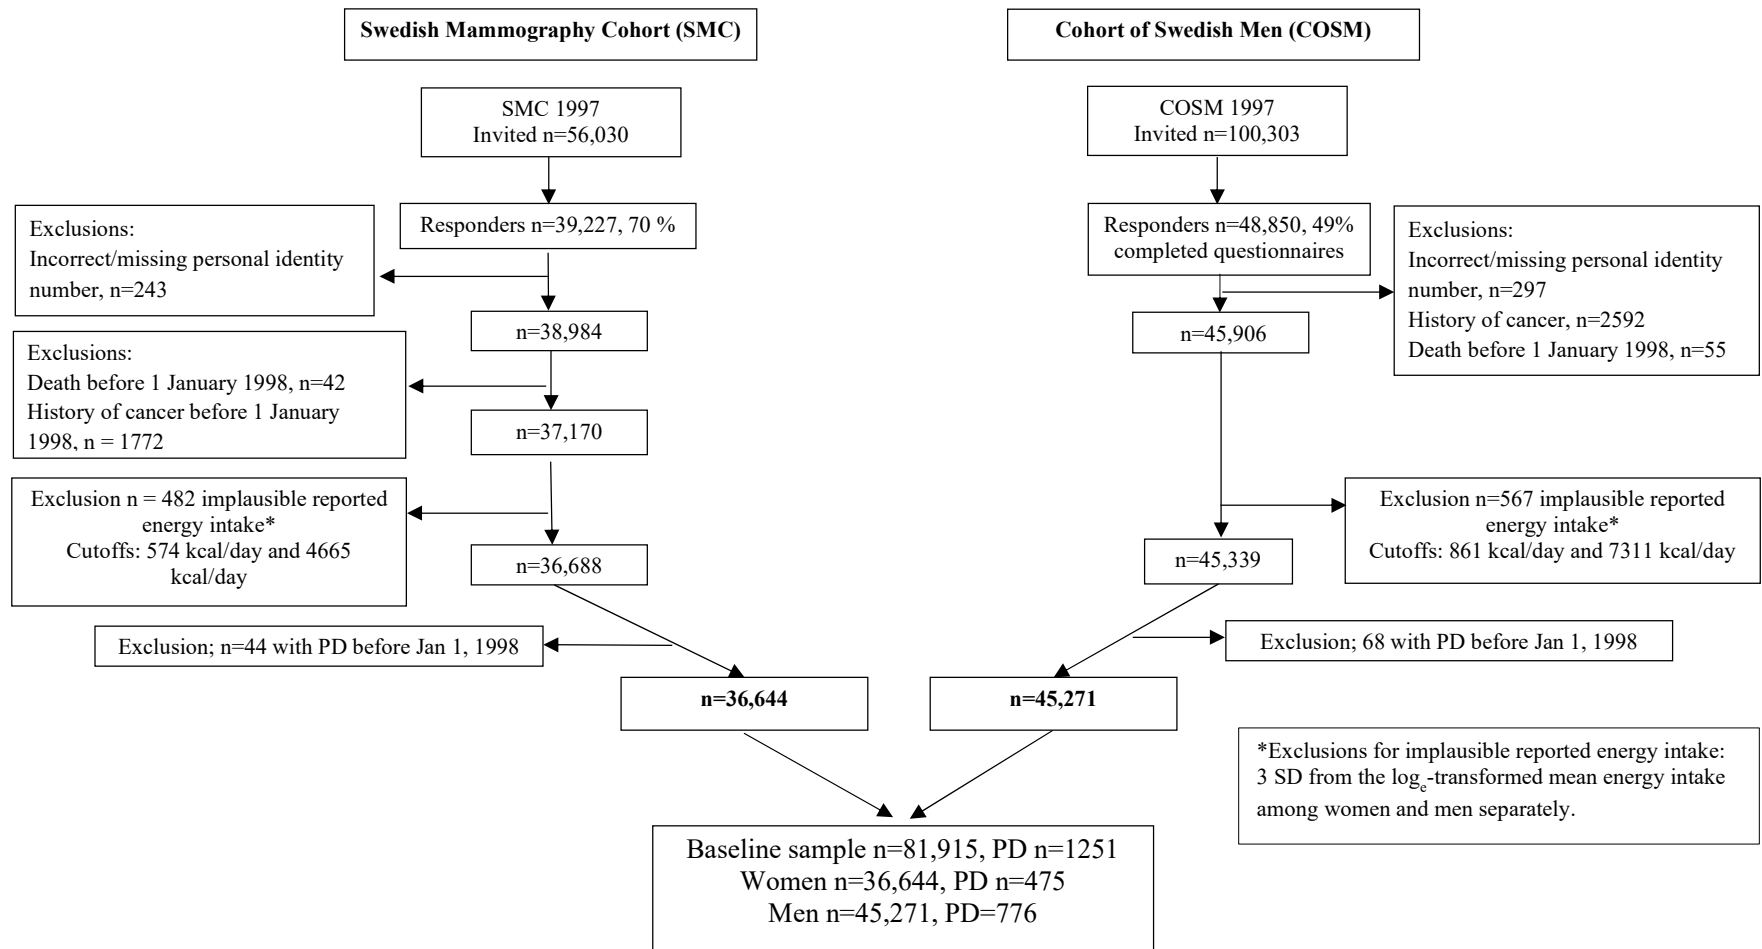

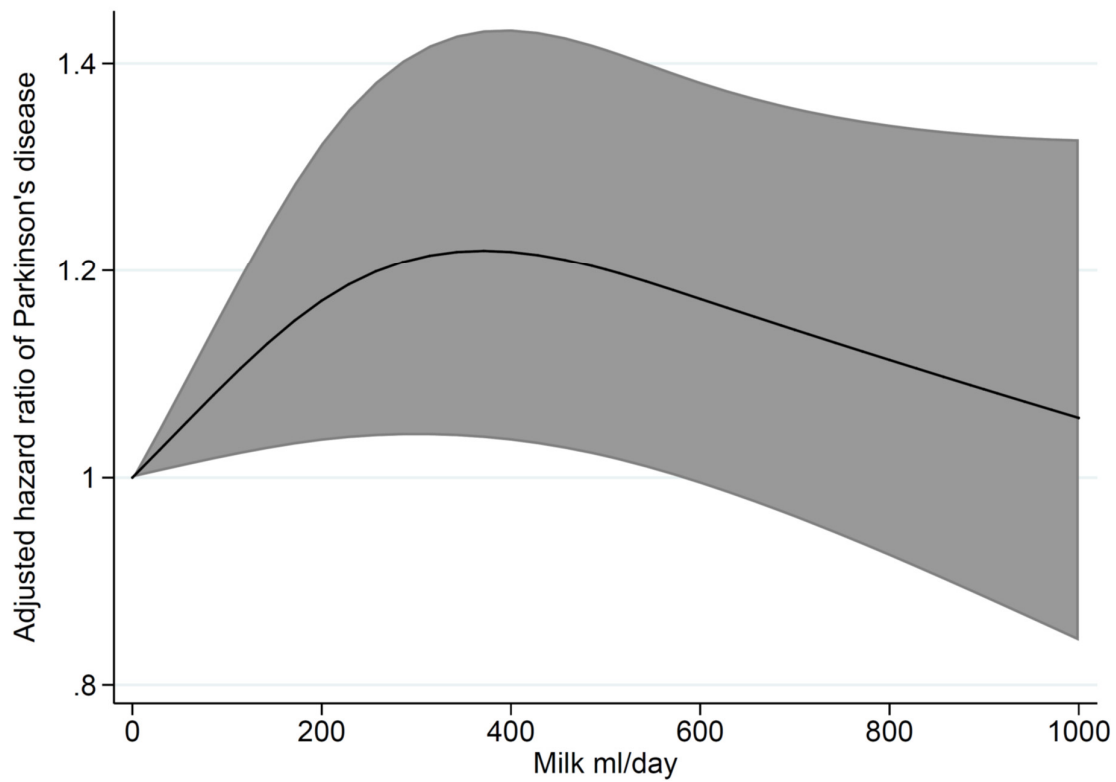

**Figure S2.** Adjusted spline curves of relation between milk intake and Parkinson's disease in The Swedish Mammography Cohort (SMC) and the Cohort of Swedish Men (COSM). Covariates were adjusted for sex, smoking, education, alcohol, coffee, total energy intake, body mass index, physical activity, living alone, fruit and vegetables, vitamin and mineral supplements, and fermented milk.

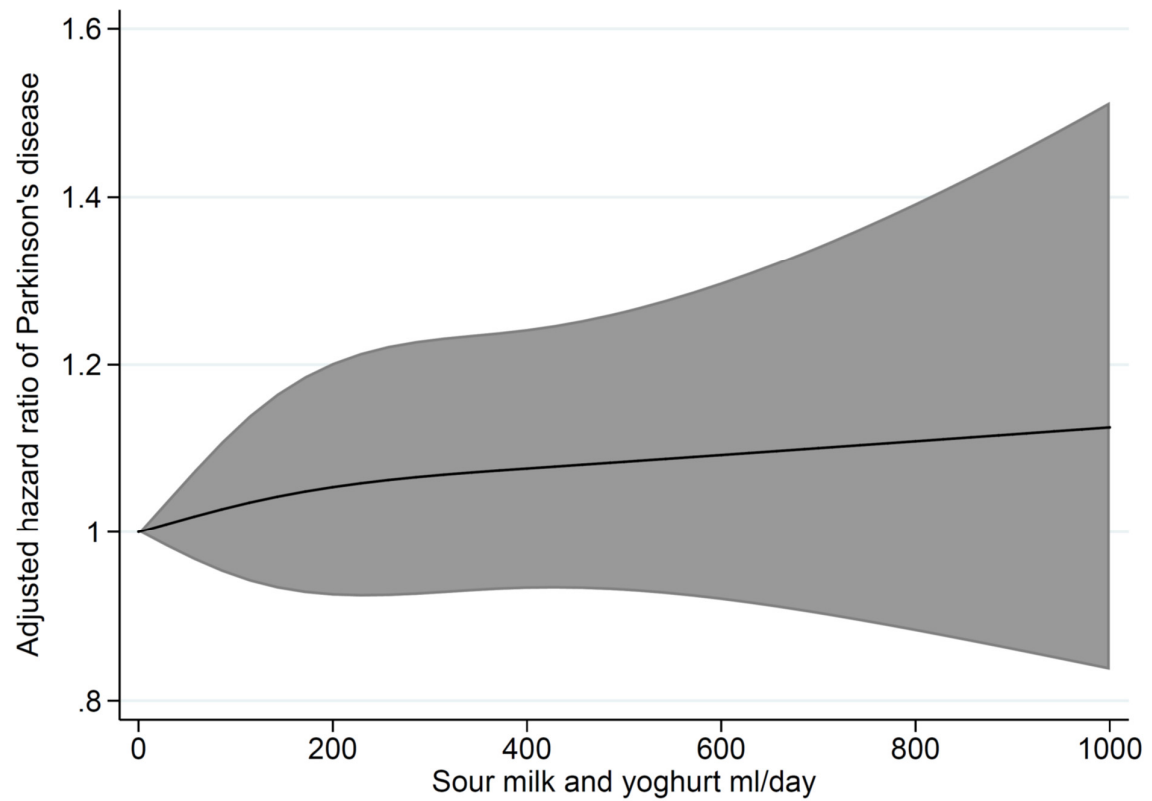

**Figure S3.** Adjusted spline curves of relation between fermented milk intake and Parkinson's disease in The Swedish Mammography Cohort (SMC) and the Cohort of Swedish Men (COSM). Covariates were adjusted for sex, smoking, education, alcohol, coffee, total energy intake, body mass index, physical activity, living alone, fruit and vegetables, vitamin and mineral supplements, and milk.

**Table S1.** Characteristics of cohort studies on milk and fermented milk or yogurt consumption and Parkinson's disease

| First Author, Year     | Cohort Name                                                                   | Country | No. of PD Cases            | Sex & no. of Participants            | Age Range, Years | Follow-up years | Assessment of intake                                  | Assessment of PD                                                                                                                                                                                                                                                                                                                   | Exposure/ Categories       | RR (95% CI)    | Adjustments                                                                                                                                      |
|------------------------|-------------------------------------------------------------------------------|---------|----------------------------|--------------------------------------|------------------|-----------------|-------------------------------------------------------|------------------------------------------------------------------------------------------------------------------------------------------------------------------------------------------------------------------------------------------------------------------------------------------------------------------------------------|----------------------------|----------------|--------------------------------------------------------------------------------------------------------------------------------------------------|
| Park et al. (2005) [1] | Honolulu Heart Program                                                        | USA     | 128                        | M: 7504                              | 45-68            | 30              | 24-hour recall, validated against 7-day diet record.  | Prior to 1991, review of hospital records, death certificates, review of local neurologist's medical records. 1991-1993; structured interviews by technician then a neurologist. 1994 to 1996 and 1997 to 1998 participants were asked about PD diagnosis and use of PD medications. Medical records were reviewed by neurologist. | Oz/d<br>Total milk intake: |                | Age, pack-years of smoking, coffee intake, physical activity, triceps skinfold, total calories and fat intake, and years worked on a plantation. |
|                        |                                                                               |         | 43                         |                                      |                  |                 |                                                       |                                                                                                                                                                                                                                                                                                                                    | 0                          | 0              |                                                                                                                                                  |
|                        |                                                                               |         | 47                         |                                      |                  |                 |                                                       |                                                                                                                                                                                                                                                                                                                                    | >0-8                       | 0.9 (0.6, 1.4) |                                                                                                                                                  |
|                        |                                                                               |         | 20                         |                                      |                  |                 |                                                       |                                                                                                                                                                                                                                                                                                                                    | 8-16                       | 1.2 (0.7, 2.0) |                                                                                                                                                  |
|                        |                                                                               |         | 18                         |                                      |                  |                 |                                                       |                                                                                                                                                                                                                                                                                                                                    | >16                        | 2.3 (1.3, 4.1) |                                                                                                                                                  |
| Chen et al. (2007) [2] | Cancer Prevention Study II- Nutrition Cohort from the American Cancer Society | USA     | M: 250<br>W: 138<br>T: 388 | M: 57,689<br>W: 73,175<br>T: 130,864 | 50-74            | 9               | Semi-quantitative food frequency questionnaire (FFQ). | Participants who reported a diagnosis of PD in the 2001 questionnaire were written to and asked for permission to contact their neurologist or internists. The neurologist or internists were asked to complete a diagnostic questionnaire or send a copy of the medical record. Medical records reviewed by specialist.           | Quintiles (g/d)            |                | Age, sex, smoking status, energy intake, vigorous physical activity, educational level, ibuprofen use, and pesticide exposure.                   |
|                        |                                                                               |         | 49                         |                                      |                  |                 |                                                       |                                                                                                                                                                                                                                                                                                                                    | Milk:                      | All            |                                                                                                                                                  |
|                        |                                                                               |         | 78                         |                                      |                  |                 |                                                       |                                                                                                                                                                                                                                                                                                                                    | 0-84.3                     | 1.0            |                                                                                                                                                  |
|                        |                                                                               |         | 87                         |                                      |                  |                 |                                                       |                                                                                                                                                                                                                                                                                                                                    | 84.4-155.4                 | 1.4 (1.0, 2.1) |                                                                                                                                                  |
|                        |                                                                               |         | 76                         |                                      |                  |                 |                                                       |                                                                                                                                                                                                                                                                                                                                    | 155.4-273.1                | 1.6 (1.1, 2.3) |                                                                                                                                                  |
|                        |                                                                               |         | 98                         |                                      |                  |                 |                                                       |                                                                                                                                                                                                                                                                                                                                    | 273.1-397.1                | 1.4 (0.9, 1.9) |                                                                                                                                                  |
|                        |                                                                               |         |                            |                                      |                  |                 |                                                       |                                                                                                                                                                                                                                                                                                                                    | >397.1                     | 1.7 (1.2, 2.4) |                                                                                                                                                  |
|                        |                                                                               |         | 31                         |                                      |                  |                 |                                                       |                                                                                                                                                                                                                                                                                                                                    | Men                        |                |                                                                                                                                                  |
|                        |                                                                               |         | 50                         |                                      |                  |                 |                                                       |                                                                                                                                                                                                                                                                                                                                    | 0-84.3                     | 1.0            |                                                                                                                                                  |
|                        |                                                                               |         | 54                         |                                      |                  |                 |                                                       |                                                                                                                                                                                                                                                                                                                                    | 84.4-155.4                 | 1.4 (0.9, 2.2) |                                                                                                                                                  |
|                        |                                                                               |         | 45                         |                                      |                  |                 |                                                       |                                                                                                                                                                                                                                                                                                                                    | 155.4-273.1                | 1.5 (1.0, 2.4) |                                                                                                                                                  |
|                        |                                                                               |         | 70                         |                                      |                  |                 |                                                       |                                                                                                                                                                                                                                                                                                                                    | 273.1-397.1                | 1.2 (0.7, 1.9) |                                                                                                                                                  |
|                        |                                                                               |         |                            |                                      |                  |                 |                                                       |                                                                                                                                                                                                                                                                                                                                    | >397.1                     | 1.8 (1.2, 2.9) |                                                                                                                                                  |
|                        |                                                                               |         | 18                         |                                      |                  |                 |                                                       |                                                                                                                                                                                                                                                                                                                                    | Women                      |                |                                                                                                                                                  |
|                        |                                                                               |         | 28                         |                                      |                  |                 |                                                       |                                                                                                                                                                                                                                                                                                                                    | 0-84.3                     | 1.0            |                                                                                                                                                  |
|                        |                                                                               |         | 33                         |                                      |                  |                 |                                                       |                                                                                                                                                                                                                                                                                                                                    | 84.4-155.4                 | 1.4 (0.8, 2.6) |                                                                                                                                                  |
|                        |                                                                               |         | 31                         |                                      |                  |                 |                                                       |                                                                                                                                                                                                                                                                                                                                    | 155.4-273.1                | 1.8 (1.0, 3.1) |                                                                                                                                                  |
|                        |                                                                               |         | 28                         |                                      |                  |                 |                                                       |                                                                                                                                                                                                                                                                                                                                    | 273.1-397.1                | 1.7 (0.9, 3.0) |                                                                                                                                                  |
|                        |                                                                               |         |                            |                                      |                  |                 |                                                       |                                                                                                                                                                                                                                                                                                                                    | >397.1                     | 1.5 (0.8, 2.8) |                                                                                                                                                  |
|                        |                                                                               |         | 171                        |                                      |                  |                 |                                                       |                                                                                                                                                                                                                                                                                                                                    | Yogurt:                    | All            |                                                                                                                                                  |
|                        |                                                                               |         | 76                         |                                      |                  |                 |                                                       |                                                                                                                                                                                                                                                                                                                                    | 0                          | 1.0            |                                                                                                                                                  |
|                        |                                                                               |         | 44                         |                                      |                  |                 |                                                       |                                                                                                                                                                                                                                                                                                                                    | 4-14.7                     | 1.3 (1.0, 1.8) |                                                                                                                                                  |
|                        |                                                                               |         | 55                         |                                      |                  |                 |                                                       |                                                                                                                                                                                                                                                                                                                                    | 14.7-35.4                  | 0.9 (0.7, 1.3) |                                                                                                                                                  |
|                        |                                                                               |         | 42                         |                                      |                  |                 |                                                       |                                                                                                                                                                                                                                                                                                                                    | 35.4-92.9                  | 1.1 (0.8, 1.4) |                                                                                                                                                  |
|                        |                                                                               |         |                            |                                      |                  |                 |                                                       |                                                                                                                                                                                                                                                                                                                                    | >92.9                      | 0.9 (0.6, 1.3) |                                                                                                                                                  |
|                        |                                                                               |         | 127                        |                                      |                  |                 |                                                       |                                                                                                                                                                                                                                                                                                                                    | Men                        |                |                                                                                                                                                  |
|                        |                                                                               |         | 41                         |                                      |                  |                 |                                                       |                                                                                                                                                                                                                                                                                                                                    | 0                          | 1.0            |                                                                                                                                                  |
|                        |                                                                               |         | 27                         |                                      |                  |                 |                                                       |                                                                                                                                                                                                                                                                                                                                    | 4-14.7                     | 1.2 (0.8, 1.7) |                                                                                                                                                  |
|                        |                                                                               |         |                            |                                      |                  |                 |                                                       |                                                                                                                                                                                                                                                                                                                                    | 14.7-35.4                  | 1.0 (0.7, 1.5) |                                                                                                                                                  |

|                              |                                                                               |         |                             |                                      |                    |                |                                                                                                                    |                                                                                                                                                                                                                                                                                       |                                                      |                        |                                                                                                                                                                                       |
|------------------------------|-------------------------------------------------------------------------------|---------|-----------------------------|--------------------------------------|--------------------|----------------|--------------------------------------------------------------------------------------------------------------------|---------------------------------------------------------------------------------------------------------------------------------------------------------------------------------------------------------------------------------------------------------------------------------------|------------------------------------------------------|------------------------|---------------------------------------------------------------------------------------------------------------------------------------------------------------------------------------|
|                              |                                                                               |         | 33                          |                                      |                    |                |                                                                                                                    |                                                                                                                                                                                                                                                                                       | 35.4-92.9                                            | 1.1 (0.7, 1.5)         |                                                                                                                                                                                       |
|                              |                                                                               |         | 22                          |                                      |                    |                |                                                                                                                    |                                                                                                                                                                                                                                                                                       | >92.9                                                | 0.9 (0.6, 1.4)         |                                                                                                                                                                                       |
|                              |                                                                               |         | 44                          |                                      |                    |                |                                                                                                                    |                                                                                                                                                                                                                                                                                       | 0                                                    | 1.0                    |                                                                                                                                                                                       |
|                              |                                                                               |         | 35                          |                                      |                    |                |                                                                                                                    |                                                                                                                                                                                                                                                                                       | 4-14.7                                               | 1.7 (1.1, 2.6)         |                                                                                                                                                                                       |
|                              |                                                                               |         | 17                          |                                      |                    |                |                                                                                                                    |                                                                                                                                                                                                                                                                                       | 14.7-35.4                                            | 0.9 (0.5, 1.6)         |                                                                                                                                                                                       |
|                              |                                                                               |         | 22                          |                                      |                    |                |                                                                                                                    |                                                                                                                                                                                                                                                                                       | 35.4-92.9                                            | 1.1 (0.7, 1.8)         |                                                                                                                                                                                       |
|                              |                                                                               |         | 20                          |                                      |                    |                |                                                                                                                    |                                                                                                                                                                                                                                                                                       | >92.9                                                | 1.0 (0.6, 1.6)         |                                                                                                                                                                                       |
| Sääksjärvi et al. (2013) [3] | Finnish Mobile Clinic Survey                                                  | Finland | M: 45<br>W: 40<br>T: 85     | M: 2388<br>W: 2136<br>T: 4524        | 40-79              | 41             | Dietary history interview, food item per day, week, month, year, and portion sizes included, trained interviewers. | PD-cases identified through linkage with Drug Imbursement Register of the Social Insurance Institution. All individuals in Finland with PD are eligible for medication free of charge and must have a certificate from a treating neurologist. Re-evaluated by the study neurologist. | Tertiles (g/d)                                       |                        | Age, sex, marital status, community density, geographical area, smoking, BMI, leisure-time physical activity, energy, hypertension, serum cholesterol, diabetes, and in women parity. |
|                              |                                                                               |         | 10                          |                                      |                    |                |                                                                                                                    |                                                                                                                                                                                                                                                                                       | Milk:                                                | Men                    |                                                                                                                                                                                       |
|                              |                                                                               |         | 21                          |                                      |                    |                |                                                                                                                    |                                                                                                                                                                                                                                                                                       | T1≤ 545                                              | 1.00                   |                                                                                                                                                                                       |
|                              |                                                                               |         | 14                          |                                      |                    |                |                                                                                                                    |                                                                                                                                                                                                                                                                                       | T2≤ 950                                              | 1.99 (0.91, 4.38)      |                                                                                                                                                                                       |
|                              |                                                                               |         |                             |                                      |                    |                |                                                                                                                    |                                                                                                                                                                                                                                                                                       | T3> 950                                              | 1.24 (0.48, 3.17)      |                                                                                                                                                                                       |
|                              |                                                                               |         | 5                           |                                      |                    |                |                                                                                                                    |                                                                                                                                                                                                                                                                                       | T1≤ 370                                              | 1.00                   |                                                                                                                                                                                       |
|                              |                                                                               |         | 16                          |                                      |                    |                |                                                                                                                    |                                                                                                                                                                                                                                                                                       | T2≤ 613                                              | 3.08 (1.10, 8.60)      |                                                                                                                                                                                       |
|                              |                                                                               |         | 19                          |                                      |                    |                |                                                                                                                    |                                                                                                                                                                                                                                                                                       | T3> 613                                              | 3.31 (1.10, 9.93)      |                                                                                                                                                                                       |
|                              |                                                                               |         |                             |                                      |                    |                |                                                                                                                    |                                                                                                                                                                                                                                                                                       | Milk:                                                | Combined men and women |                                                                                                                                                                                       |
|                              |                                                                               |         |                             |                                      |                    |                |                                                                                                                    |                                                                                                                                                                                                                                                                                       | Highest vs. lowest tertile                           | 2.16 (1.09, 4.28)      |                                                                                                                                                                                       |
|                              |                                                                               |         |                             |                                      |                    |                |                                                                                                                    |                                                                                                                                                                                                                                                                                       | Fermented milk:                                      | Men                    |                                                                                                                                                                                       |
|                              |                                                                               |         | 12                          |                                      |                    |                |                                                                                                                    |                                                                                                                                                                                                                                                                                       | T1< 1                                                | 1.00                   |                                                                                                                                                                                       |
|                              |                                                                               |         | 17                          |                                      |                    |                |                                                                                                                    |                                                                                                                                                                                                                                                                                       | T2≤ 150                                              | 1.45 (0.68, 3.10)      |                                                                                                                                                                                       |
|                              |                                                                               |         | 16                          |                                      |                    |                |                                                                                                                    |                                                                                                                                                                                                                                                                                       | T3> 150                                              | 1.71 (0.79, 3.70)      |                                                                                                                                                                                       |
|                              |                                                                               |         |                             |                                      |                    |                |                                                                                                                    |                                                                                                                                                                                                                                                                                       | T1≤ 23                                               | 1.00                   |                                                                                                                                                                                       |
|                              |                                                                               |         | 11                          |                                      |                    |                |                                                                                                                    |                                                                                                                                                                                                                                                                                       | T2≤ 166                                              | 1.48 (0.69, 3.16)      |                                                                                                                                                                                       |
|                              |                                                                               |         | 18                          |                                      |                    |                |                                                                                                                    |                                                                                                                                                                                                                                                                                       | T3> 166                                              | 0.76 (0.32, 1.80)      |                                                                                                                                                                                       |
|                              |                                                                               |         | 11                          |                                      |                    |                |                                                                                                                    |                                                                                                                                                                                                                                                                                       |                                                      |                        |                                                                                                                                                                                       |
| Kyrozis et al. (2013) [4]    | The European Prospective Investigation into Cancer and Nutrition (EPIC) study | Greece  | M:37<br>W:51<br>T: 88       | M:10,344<br>W:15,063<br>T: 25,407    | 20-86              |                | Semi-quantitative questionnaire, trained interviewers.                                                             | Participants were asked to report medical diagnosis of PD or use of anti-PD drugs. Possible incident cases were assessed by telephone interview.                                                                                                                                      | Effect estimates for a 1-SD increase in intake (g/d) |                        | Gender, age, marital status, education, farming, smoking, coffee with caffeine, BMI, physical activity, and energy intake.                                                            |
|                              |                                                                               |         |                             |                                      |                    |                |                                                                                                                    |                                                                                                                                                                                                                                                                                       | Milk                                                 | All                    |                                                                                                                                                                                       |
|                              |                                                                               |         |                             |                                      |                    |                |                                                                                                                    |                                                                                                                                                                                                                                                                                       | Yogurt                                               | 1.34 (1.14, 1.58)      |                                                                                                                                                                                       |
|                              |                                                                               |         |                             |                                      |                    |                |                                                                                                                    |                                                                                                                                                                                                                                                                                       |                                                      | 0.86 (0.65, 1.15)      |                                                                                                                                                                                       |
| Hughes et al (2017) [5]      | Health Professionals Follow-up Study and Nurses' Health Study                 | USA     | M: 554<br>W: 482<br>T: 1036 | M: 48,610<br>W: 80,736<br>T: 129,346 | M:40-75<br>W:30-55 | M: 24<br>W: 26 | FFQ                                                                                                                | PD cases were identified with biennial self-report questionnaires. Before 2003, those who indicated PD diagnosis, their neurologist were contacted or medical records were reviewed. Since 2003 all who self-reported                                                                 | Servings per week or day                             |                        | Age, pack-years of smoking, coffee intake, body mass index, physical activity, alcohol intake, and total energy intake.                                                               |
|                              |                                                                               |         | 53                          |                                      |                    |                |                                                                                                                    |                                                                                                                                                                                                                                                                                       | Total milk:                                          | Men                    |                                                                                                                                                                                       |
|                              |                                                                               |         | 134                         |                                      |                    |                |                                                                                                                    |                                                                                                                                                                                                                                                                                       | ≤ 3/month                                            | 1.0                    |                                                                                                                                                                                       |
|                              |                                                                               |         |                             |                                      |                    |                |                                                                                                                    |                                                                                                                                                                                                                                                                                       | 1-4/week                                             | 1.41 (1.02, 1.95)      |                                                                                                                                                                                       |

|     |                                 |              |                   |
|-----|---------------------------------|--------------|-------------------|
| 177 | PD, their records were reviewed | 5/week-1/day | 1.23 (0.90, 1.68) |
| 190 | by a neurologist.               | > 1/day      | 1.42 (1.03, 1.96) |
|     |                                 | Women        |                   |
| 34  |                                 | ≤ 3/month    | 1.0               |
| 99  |                                 | 1-4/week     | 1.18 (0.79, 1.75) |
| 152 |                                 | 5/week-1/day | 1.08 (0.74, 1.57) |
| 197 |                                 | > 1/day      | 1.30 (0.88, 1.90) |
|     |                                 | Total milk:  | Pooled analysis   |
|     |                                 |              | men and women     |
|     |                                 | ≤ 3/month    | 1.0               |
|     |                                 | 1-4/week     | 1.31 (1.02, 1.69) |
|     |                                 | 5/week-1/day | 1.16 (0.91, 1.48) |
|     |                                 | > 1/day      | 1.37 (1.07, 1.75) |

Abbreviations: BMI, Body Mass Index; CI, confidence interval; d, day; FFQ, food frequency questionnaire; M, Men; No, Numbers; PD, Parkinson's disease; SD, standard deviation; T, Total population; W, Women.

1. Park, M.; Ross, G.W.; Petrovitch, H.; White, L.R.; Masaki, K.H.; Nelson, J.S.; Tanner, C.M.; Curb, J.D.; Blanchette, P.L.; Abbott, R.D. Consumption of milk and calcium in midlife and the future risk of Parkinson disease. *Neurology* **2005**, *64*, 1047-1051, doi:10.1212/01.WNL.0000154532.98495.BF.
2. Chen, H.; O'Reilly, E.; McCullough, M.L.; Rodriguez, C.; Schwarzschild, M.A.; Calle, E.E.; Thun, M.J.; Ascherio, A. Consumption of dairy products and risk of Parkinson's disease. *Am. J. Epidemiol.* **2007**, *165*, 998-1006, doi:10.1093/aje/kwk089.
3. Saaksjarvi, K.; Knekt, P.; Lundqvist, A.; Mannisto, S.; Heliovaara, M.; Rissanen, H.; Jarvinen, R. A cohort study on diet and the risk of Parkinson's disease: the role of food groups and diet quality. *Br. J. Nutr.* **2013**, *109*, 329-337, doi:10.1017/S0007114512000955.
4. Kyrozi, A.; Ghika, A.; Stathopoulos, P.; Vassilopoulos, D.; Trichopoulos, D.; Trichopoulou, A. Dietary and lifestyle variables in relation to incidence of Parkinson's disease in Greece. *Eur. J. Epidemiol.* **2013**, *28*, 67-77, doi:10.1007/s10654-012-9760-0.
5. Hughes, K.C.; Gao, X.; Kim, I.Y.; Wang, M.; Weisskopf, M.G.; Schwarzschild, M.A.; Ascherio, A. Intake of dairy foods and risk of Parkinson disease. *Neurology* **2017**, *89*, 46-52, doi:10.1212/WNL.0000000000004057.

**Table S2.** Baseline characteristics of women by categories of glasses\* of milk per day

|                 |                               | Glasses* of milk per day |             |            |             |             |
|-----------------|-------------------------------|--------------------------|-------------|------------|-------------|-------------|
| Factor          | Unit or Level                 | <0.2                     | 0.2-0.8     | 0.8-1.1    | 1.1-2.0     | >2.0        |
| N               |                               | 8251                     | 7207        | 9211       | 8042        | 3933        |
| Age at entry    | Years, mean (SD)              | 60.4 (8.81)              | 60.5 (8.61) | 63 (9.32)  | 64.2 (9.47) | 64.2 (9.26) |
| Body Mass Index | Kg/m <sup>2</sup> , mean (SD) | 24.5 (3.81)              | 25 (3.87)   | 25 (3.86)  | 25.4 (4.03) | 25.5 (4.17) |
| Height          | Cm, mean (SD)                 | 165 (5.72)               | 165 (5.69)  | 165 (5.74) | 164 (5.85)  | 164 (5.83)  |

|                                      |                           |              |                   |             |              |             |
|--------------------------------------|---------------------------|--------------|-------------------|-------------|--------------|-------------|
| Weight                               | Kg, mean (SD)             | 66.7 (10.9)  | 68.1 (11.2)       | 67.8 (11.1) | 68.6 (11.4)  | 69.1 (11.8) |
| Education, n (%)                     | <10 years                 | 3077 (37.4)  | 2658 (36.9)       | 3869 (42.0) | 3768 (46.9)  | 1844 (46.9) |
|                                      | 10-12 years               | 3312 (40.2)  | 2967 (41.2)       | 3545 (38.5) | 3061 (38.1)  | 1492 (37.9) |
|                                      | >12 years                 | 1846 (22.4)  | 1579 (21.9)       | 1791 (19.5) | 1207 (15.0)  | 596 (15.2)  |
| Smoking status and pack years, n (%) | Never smoker              | 3849 (47.6)  | 3687 (52.0)       | 5118 (56.6) | 4569 (57.9)  | 2159 (55.7) |
|                                      | Ex <20 pack-years         | 1699 (21.0)  | 1442 (20.3)       | 1522 (16.8) | 1134 (14.4)  | 531 (13.7)  |
|                                      | Ex ≥20 pack-years         | 517 (6.4)    | 363 (5.1)         | 471 (5.2)   | 390 (4.9)    | 190 (4.9)   |
|                                      | Current <20               | 1074 (13.3)  | 910 (12.8)        | 1122 (12.4) | 982 (12.4)   | 491 (12.7)  |
|                                      | Current ≥20               | 941 (11.6)   | 691 (9.7)         | 805 (8.9)   | 822 (10.4)   | 502 (13.0)  |
| Walk this year, n (%)                | Almost never              | 867 (11.6)   | 641 (9.5)         | 867 (10.2)  | 861 (11.6)   | 478 (13.3)  |
|                                      | <20 min/day               | 1465 (19.5)  | 1274 (18.9)       | 1601 (18.8) | 1399 (18.9)  | 642 (17.8)  |
|                                      | 20-40 min/day             | 2531 (33.7)  | 2480 (36.8)       | 2986 (35.1) | 2466 (33.3)  | 1130 (31.4) |
|                                      | 40-60 min/day             | 1384 (18.4)  | 1262 (18.7)       | 1563 (18.4) | 1377 (18.6)  | 669 (18.6)  |
|                                      | >60 min/day               | 1255 (16.7)  | 1079 (16.0)       | 1484 (17.5) | 1295 (17.5)  | 680 (18.9)  |
| Exercise this year, n (%)            | <1 hour/week              | 1595 (21.7)  | 1164 (17.8)       | 1571 (19.0) | 1398 (19.7)  | 721 (20.9)  |
|                                      | 1 hour/week               | 1704 (23.2)  | 1651 (25.2)       | 1961 (23.7) | 1660 (23.3)  | 752 (21.8)  |
|                                      | 2-3 hours/week            | 2361 (32.2)  | 2307 (35.2)       | 2832 (34.2) | 2429 (34.1)  | 1119 (32.5) |
|                                      | ≥4 hours/week             | 1681 (22.9)  | 1434 (21.9)       | 1909 (23.1) | 1627 (22.9)  | 855 (24.8)  |
| Living alone                         | N, (%)                    | 1560 (21.8)  | 1367 (21.9)       | 1961 (24.6) | 1850 (26.5)  | 905 (26.7)  |
| Aspirin use                          | N, (%)                    | 3599 (50.3)  | 3229 (51.2)       | 3972 (50.1) | 3466 (50.5)  | 1769 (52.4) |
| High blood pressure                  | N, (%)                    | 1482 (18.0)  | 1429 (19.8)       | 1983 (21.5) | 1901 (23.6)  | 931 (23.7)  |
| Hormone replacement                  | N, (%)                    | 4254 (51.6)  | 3708 (51.4)       | 4503 (48.9) | 3724 (46.3)  | 1830 (46.5) |
| Vitamin- and mineral supplements     | N, (%)                    | 4177 (54.5)  | 3655 (53.9)       | 4568 (53.6) | 3912 (53.4)  | 1932 (53.6) |
| Total energy intake                  | Kcal/day, mean (SD)       | 1648 (524)   | 1661 (491)        | 1698 (494)  | 1794 (514)   | 2025 (585)  |
| Fermented milk intake                | Servings/day, mean (SD)   | 0.914 (1.03) | 0.805 (0.88)      | 0.83 (0.89) | 0.883 (1.01) | 1 (1.39)    |
| Coffee intake                        | Cups/day, mean (SD)       | 3.04 (1.81)  | 2.93 (1.68)       | 3.05 (1.7)  | 3.16 (1.75)  | 3.44 (1.9)  |
| Alcohol intake                       | Gram/day, mean (SD)       | 6.52 (8.8)   | 6.6 (10.4)        | 4.89 (7.03) | 4.3 (6.69)   | 4.51 (15.1) |
| Fruit and vegetables                 | Servings/day, mean (SD)   | 5.25 (3.02)  | 5.22 (2.72)       | 5.13 (2.87) | 4.91 (2.86)  | 4.78 (2.77) |
| Milk intake                          | Glasses/day, median (IQR) | 0 (0, 0)     | 0.43 (0.29, 0.57) | 1 (1, 1)    | 2 (1.86, 2)  | 3 (3, 4)    |

IQR, interquartile range; N, number; SD, standard deviation

\*1 glass corresponds to 200 ml.

**Table S3.** Baseline characteristics of men by categories of glasses\* of milk per day

| Factor                               | Unit or level                 | Glasses* of milk per day |               |               |               |              |
|--------------------------------------|-------------------------------|--------------------------|---------------|---------------|---------------|--------------|
|                                      |                               | <0.2                     | 0.2-0.8       | 0.8-1.1       | 1.1-2.0       | >2.0         |
| N                                    |                               | 9929                     | 7641          | 8706          | 10164         | 8831         |
| Age at entry                         | Years, mean (SD)              | 59.5 (9.38)              | 59 (9.32)     | 61.6 (9.86)   | 62.2 (9.82)   | 61.4 (9.75)  |
| Body Mass Index                      | Kg/m <sup>2</sup> , mean (SD) | 25.6 (3.28)              | 25.7 (3.22)   | 25.5 (3.24)   | 25.8 (3.33)   | 26.3 (3.55)  |
| Height                               | Cm, mean (SD)                 | 177 (6.74)               | 178 (6.67)    | 177 (6.62)    | 177 (6.64)    | 177 (6.79)   |
| Weight                               | Kg, mean (SD)                 | 80.4 (11.4)              | 80.8 (11.2)   | 80.2 (11.1)   | 80.9 (11.5)   | 82.6 (12.2)  |
| Education, n (%)                     | <10 years                     | 3121 (31.6)              | 2188 (28.7)   | 2854 (32.9)   | 3902 (38.5)   | 3647 (41.5)  |
|                                      | 10-12 years                   | 4900 (49.6)              | 3881 (50.9)   | 4279 (49.3)   | 4828 (47.7)   | 4154 (47.2)  |
|                                      | >12 years                     | 1865 (18.9)              | 1556 (20.4)   | 1547 (17.8)   | 1396 (13.8)   | 997 (11.3)   |
| Smoking status and pack years, n (%) | Never smoker                  | 3231 (33.0)              | 2792 (37.0)   | 3321 (38.7)   | 3819 (38.1)   | 2992 (34.4)  |
|                                      | Ex <20 pack-years             | 2416 (24.7)              | 1882 (24.9)   | 2012 (23.4)   | 2073 (20.7)   | 1744 (20.0)  |
|                                      | Ex ≥20 pack-years             | 1724 (17.6)              | 1144 (15.2)   | 1324 (15.4)   | 1607 (16.1)   | 1466 (16.8)  |
|                                      | Current <20                   | 905 (9.2)                | 667 (8.8)     | 718 (8.4)     | 935 (9.3)     | 839 (9.6)    |
|                                      | Current ≥20                   | 1523 (15.5)              | 1064 (14.1)   | 1210 (14.1)   | 1577 (15.8)   | 1661 (19.1)  |
| Walk this year, n (%)                | Almost never                  | 1301 (14.7)              | 913 (13.1)    | 1005 (12.7)   | 1227 (13.3)   | 1135 (14.2)  |
|                                      | <20 min/day                   | 2197 (24.7)              | 1798 (25.7)   | 1886 (23.8)   | 2185 (23.6)   | 1888 (23.6)  |
|                                      | 20-40 min/day                 | 2588 (29.1)              | 2174 (31.1)   | 2408 (30.4)   | 2678 (29.0)   | 2121 (26.5)  |
|                                      | 40-60 min/day                 | 1366 (15.4)              | 1039 (14.9)   | 1247 (15.7)   | 1416 (15.3)   | 1207 (15.1)  |
|                                      | >60 min/day                   | 1428 (16.1)              | 1071 (15.3)   | 1387 (17.5)   | 1743 (18.8)   | 1638 (20.5)  |
| Exercise this year, n (%)            | <1 hour/week                  | 2123 (24.1)              | 1456 (21.1)   | 1529 (19.5)   | 1929 (21.1)   | 1826 (23.4)  |
|                                      | 1 hour/week                   | 1670 (18.9)              | 1394 (20.2)   | 1496 (19.1)   | 1706 (18.7)   | 1412 (18.1)  |
|                                      | 2-3 hours/week                | 2688 (30.5)              | 2252 (32.6)   | 2540 (32.4)   | 2863 (31.4)   | 2324 (29.8)  |
|                                      | ≥4 hours/week                 | 2332 (26.5)              | 1806 (26.1)   | 2265 (28.9)   | 2623 (28.8)   | 2246 (28.8)  |
| Living alone                         | N, (%)                        | 1733 (17.5)              | 1146 (15.0)   | 1413 (16.3)   | 1779 (17.6)   | 1775 (20.2)  |
| Aspirin use                          | N, (%)                        | 3145 (34.8)              | 2665 (37.7)   | 2840 (35.9)   | 3344 (36.4)   | 2972 (37.5)  |
| High blood pressure                  | N, (%)                        | 2346 (23.6)              | 1742 (22.8)   | 2182 (25.1)   | 2681 (26.4)   | 2353 (26.6)  |
| Vitamin- and mineral supplements     | N, (%)                        | 3012 (32.7)              | 2296 (31.7)   | 2751 (33.9)   | 2977 (31.9)   | 2496 (30.7)  |
| Total energy intake                  | Kcal/day, mean (SD)           | 2529 (824)               | 2503 (760)    | 2547 (759)    | 2668 (793)    | 3044 (908)   |
| Fermented milk intake                | Servings/day, mean (SD)       | 0.815 (1.06)             | 0.704 (0.867) | 0.682 (0.857) | 0.727 (0.978) | 0.772 (1.15) |
| Coffee intake                        | Cups/day, mean (SD)           | 3.44 (2.17)              | 3.25 (2.01)   | 3.33 (1.95)   | 3.48 (1.99)   | 3.87 (2.24)  |



|                      |                           |             |                   |             |             |             |
|----------------------|---------------------------|-------------|-------------------|-------------|-------------|-------------|
| Alcohol intake       | Gram/day, mean (SD)       | 17 (22.6)   | 15.4 (23.7)       | 12.5 (17.6) | 11.7 (17.5) | 11.8 (23.5) |
| Fruit and vegetables | Servings/day, mean (SD)   | 4.07 (2.58) | 4.06 (2.3)        | 4.02 (2.35) | 3.81 (2.29) | 3.54 (2.28) |
| Milk intake          | Glasses/day, median (IQR) | 0 (0, 0)    | 0.43 (0.29, 0.71) | 1 (1, 1)    | 2 (1.71, 2) | 3 (3, 4)    |

IQR, interquartile range; N, number; SD, standard deviation

\*1 glass corresponds to 200 ml.

**Table S4.** Association between milk intake and Parkinson's disease in the whole study population

| Glasses* per day (median intake in glasses* per day) | Total N | Cases | Model 1 <sup>1,2</sup><br>HR (95% CI) | Model 2 <sup>3,4</sup><br>HR (95% CI) | Model 3 <sup>5,6</sup><br>HR (95% CI) | Model 4 <sup>7,8</sup><br>HR (95% CI) |
|------------------------------------------------------|---------|-------|---------------------------------------|---------------------------------------|---------------------------------------|---------------------------------------|
| <0.2 (0)                                             | 18 180  | 214   | Referent                              | Referent                              | Referent                              | Referent                              |
| 0.2-0.8 (0.43)                                       | 14 848  | 224   | 1.29 (1.07, 1.55)                     | 1.26 (1.05, 1.53)                     | 1.29 (1.07, 1.56)                     | 1.29 (1.07, 1.56)                     |
| 0.8-1.1 (1)                                          | 17 917  | 283   | 1.22 (1.02, 1.45)                     | 1.18 (0.99, 1.42)                     | 1.19 (0.99, 1.42)                     | 1.19 (0.99, 1.42)                     |
| 1.1-2.0 (2)                                          | 18 206  | 326   | 1.31 (1.10, 1.56)                     | 1.29 (1.08, 1.54)                     | 1.29 (1.08, 1.53)                     | 1.29 (1.08, 1.54)                     |
| >2.0 (3)                                             | 12 764  | 204   | 1.16 (0.96, 1.41)                     | 1.16 (0.95, 1.42)                     | 1.14 (0.93, 1.40)                     | 1.15 (0.94, 1.41)                     |

CI, confidence interval; HR, hazard ratio; N, number

\*1 glass = 200 ml.

<sup>1</sup>Adjusted for sex.

<sup>2</sup>P-value for the combined test of the different categories: 0.027.

<sup>3</sup>Adjusted for sex, smoking, education, alcohol, coffee, total energy intake, body mass index, physical activity, living alone.

<sup>4</sup>P-value for the combined test of the different categories: 0.054.

<sup>5</sup>Adjusted for sex, smoking, education, alcohol, coffee, total energy intake, body mass index, physical activity, living alone, fruit and vegetables, vitamin and mineral supplements, and fermented milk.

<sup>6</sup>P-value for the combined test of the different categories: 0.041.

<sup>7</sup>Adjusted for sex, smoking, education, alcohol, coffee, total energy intake, body mass index, physical activity, living alone, fruit and vegetables, vitamin and mineral supplements, aspirin, fermented milk, and high blood pressure.

<sup>8</sup>P-value for the combined test of the different categories: 0.039.

**Table S5.** Association between milk intake and Parkinson's disease among women (n=36 644, cases=475)

| Glasses* per day | Total N | Cases | Model 1 <sup>1,2</sup><br>HR (95% CI) | Model 2 <sup>3,4</sup><br>HR (95% CI) | Model 3 <sup>5,6</sup><br>HR (95% CI) | Model 4 <sup>7,8</sup><br>HR (95% CI) | Model 5 <sup>9,10</sup><br>HR (95% CI) |
|------------------|---------|-------|---------------------------------------|---------------------------------------|---------------------------------------|---------------------------------------|----------------------------------------|
| <0.2             | 8251    | 77    | Referent                              | Referent                              | Referent                              | Referent                              | Referent                               |
| 0.2-0.8          | 7207    | 94    | 1.36 (1.01, 1.84)                     | 1.33 (0.98, 1.80)                     | 1.35 (1.00, 1.83)                     | 1.36 (1.00, 1.84)                     | 1.35 (1.00, 1.83)                      |

|         |      |     |                   |                   |                   |                   |                   |
|---------|------|-----|-------------------|-------------------|-------------------|-------------------|-------------------|
| 0.8-1.1 | 9211 | 120 | 1.22 (0.92, 1.63) | 1.18 (0.88, 1.57) | 1.18 (0.88, 1.57) | 1.18 (0.88, 1.58) | 1.18 (0.88, 1.57) |
| 1.1-2.0 | 8042 | 122 | 1.37 (1.03, 1.83) | 1.32 (0.99, 1.77) | 1.29 (0.96, 1.72) | 1.30 (0.97, 1.74) | 1.29 (0.96, 1.73) |
| >2.0    | 3933 | 62  | 1.41 (1.01, 1.98) | 1.33 (0.94, 1.88) | 1.27 (0.89, 1.80) | 1.28 (0.90, 1.82) | 1.27 (0.89, 1.80) |

CI, confidence interval; HR, hazard ratio; N, number

\*1 glass = 200 ml.

<sup>1</sup>Crude model.

<sup>2</sup>P-value for the combined test of the different categories: 0.169.

<sup>3</sup>Adjusted for smoking, education, alcohol, coffee, total energy intake, body mass index, physical activity, living alone

<sup>4</sup>P-value for the combined test of the different categories: 0.293.

<sup>5</sup>Adjusted for smoking, education, alcohol, coffee, total energy intake, body mass index, physical activity, living alone, fruit and vegetables, vitamin and mineral supplements, yogurt and soured milk.

<sup>6</sup>P-value for the combined test of the different categories: 0.347.

<sup>7</sup>Adjusted for smoking, education, alcohol, coffee, total energy intake, body mass index, physical activity, living alone, fruit and vegetables, vitamin and mineral supplements, aspirin, yogurt and soured milk, and high blood pressure

<sup>8</sup>P-value for the combined test of the different categories: 0.329.

<sup>9</sup>Adjusted for smoking, education, alcohol, coffee, total energy intake, body mass index, physical activity, living alone, fruit and vegetables, vitamin and mineral supplements, aspirin, yogurt and soured milk, high blood pressure and hormone replacement.

<sup>10</sup>P-value for the combined test of the different categories: 0.345.

**Table S6.** Association between milk intake and Parkinson's disease among men (n=45 271, cases=776)

| Glasses*<br>per day | Total N | Cases | Model 1 <sup>1,2</sup><br>Hazard ratio (95 % CI) | Model 2 <sup>3,4</sup><br>Hazard ratio (95 % CI) | Model 3 <sup>5,6</sup><br>Hazard ratio (95 % CI) | Model 4 <sup>7,8</sup><br>Hazard ratio (95 % CI) |
|---------------------|---------|-------|--------------------------------------------------|--------------------------------------------------|--------------------------------------------------|--------------------------------------------------|
| <0.2                | 9929    | 137   | Referent                                         | Referent                                         | Referent                                         | Referent                                         |
| 0.2-0.8             | 7641    | 130   | 1.24 (0.98, 1.58)                                | 1.22 (0.96, 1.55)                                | 1.25 (0.98, 1.59)                                | 1.25 (0.98, 1.59)                                |
| 0.8-1.1             | 8706    | 163   | 1.22 (0.97, 1.53)                                | 1.20 (0.95, 1.51)                                | 1.20 (0.95, 1.51)                                | 1.20 (0.95, 1.51)                                |
| 1.1-2.0             | 10164   | 204   | 1.28 (1.03, 1.59)                                | 1.28 (1.03, 1.60)                                | 1.29 (1.03, 1.61)                                | 1.29 (1.03, 1.61)                                |
| >2.0                | 8831    | 142   | 1.06 (0.84, 1.34)                                | 1.10 (0.86, 1.41)                                | 1.10 (0.86, 1.41)                                | 1.10 (0.86, 1.42)                                |

CI, confidence interval; HR, hazard ratio; N, number

\*1 glass = 200 ml.

<sup>1</sup>Crude model.

<sup>2</sup>P-value for the combined test of the different categories: 0.139

<sup>3</sup>Adjusted for smoking, education, alcohol, coffee, total energy intake, body mass index, physical activity, living alone

<sup>4</sup>P-value for the combined test of the different categories: 0.223

<sup>5</sup>Adjusted for smoking, education, alcohol, coffee, total energy intake, body mass index, physical activity, living alone, fruit and vegetables, vitamin and mineral supplements, yogurt and soured milk

<sup>6</sup>P-value for the combined test of the different categories: 0.181

<sup>7</sup>Adjusted for smoking, education, alcohol, coffee, total energy intake, body mass index, physical activity, living alone, fruit and vegetables, vitamin and mineral supplements, aspirin, yogurt and soured milk, and high blood pressure

<sup>8</sup>P-value for the combined test of the different categories: 0.178

**Table S7.** Association between fermented milk intake and Parkinson's disease in the whole study population

| Glasses* per day (median intake in glasses* per day) | Total N | Cases | Model 1 <sup>1,2</sup><br>HR (95% CI) | Model 2 <sup>3,4</sup><br>HR (95% CI) | Model 3 <sup>5,6</sup><br>HR (95% CI) | Model 4 <sup>7,8</sup><br>HR (95% CI) |
|------------------------------------------------------|---------|-------|---------------------------------------|---------------------------------------|---------------------------------------|---------------------------------------|
| <0.2 (0)                                             | 29007   | 428   | Referent                              | Referent                              | Referent                              | Referent                              |
| 0.2-0.8 (0.43)                                       | 16475   | 218   | 0.95 (0.81, 1.12)                     | 0.92 (0.78, 1.09)                     | 0.91 (0.77, 1.08)                     | 0.91 (0.77, 1.08)                     |
| 0.8-1.1 (1)                                          | 19687   | 325   | 1.11 (0.96, 1.29)                     | 1.06 (0.92, 1.23)                     | 1.07 (0.92, 1.25)                     | 1.08 (0.93, 1.25)                     |
| >1.1 (2)                                             | 16746   | 280   | 1.09 (0.94, 1.27)                     | 1.06 (0.91, 1.24)                     | 1.07 (0.91, 1.25)                     | 1.07 (0.91, 1.25)                     |

CI, confidence interval; HR, hazard ratio; N, number

\*1 glass = 200 ml.

<sup>1</sup>Adjusted for sex.

<sup>2</sup> P-value for the combined test of the different categories: 0.218.

<sup>3</sup>Adjusted for sex, smoking, education, alcohol, coffee, total energy intake, body mass index, physical activity, living alone.

<sup>4</sup> P-value for the combined test of the different categories: 0.371.

<sup>5</sup>Adjusted for sex, smoking, education, alcohol, coffee, total energy intake, body mass index, physical activity, living alone, fruit and vegetables, vitamin- and mineral supplements, and milk.

<sup>6</sup> P-value for the combined test of the different categories: 0.244.

<sup>7</sup>Adjusted for sex, smoking, education, alcohol, coffee, total energy intake, body mass index, physical activity, living alone, fruit and vegetables, vitamin and mineral supplements, aspirin, milk, and high blood pressure.

<sup>8</sup> P-value for the combined test of the different categories: 0.247.

**Table S8.** Association between fermented milk intake and Parkinson's disease among women (n=36 644, cases=475)

| Glasses* per day | Total N | Cases | Model 1 <sup>1,2</sup><br>HR (95 % CI) | Model 2 <sup>3,4</sup><br>HR (95 % CI) | Model 3 <sup>5,6</sup><br>HR (95 % CI) | Model 4 <sup>7,8</sup><br>HR (95 % CI) | Model 5 <sup>9,10</sup><br>HR (95 % CI) |
|------------------|---------|-------|----------------------------------------|----------------------------------------|----------------------------------------|----------------------------------------|-----------------------------------------|
| <0.2             | 10134   | 124   | Referent                               | Referent                               | Referent                               | Referent                               | Referent                                |

|         |       |     |                   |                   |                   |                   |                   |
|---------|-------|-----|-------------------|-------------------|-------------------|-------------------|-------------------|
| 0.2-0.8 | 8229  | 96  | 1.02 (0.78, 1.33) | 0.99 (0.76, 1.30) | 0.99 (0.75, 1.30) | 0.99 (0.75, 1.30) | 0.98 (0.75, 1.29) |
| 0.8-1.1 | 10699 | 143 | 1.05 (0.83, 1.34) | 1.01 (0.79, 1.29) | 1.04 (0.81, 1.34) | 1.04 (0.81, 1.34) | 1.04 (0.81, 1.33) |
| >1.1    | 7582  | 112 | 1.16 (0.90, 1.49) | 1.09 (0.83, 1.43) | 1.11 (0.84, 1.45) | 1.11 (0.84, 1.45) | 1.10 (0.84, 1.44) |

CI, confidence interval; HR, hazard ratio; N, number

\*1 glass = 200 ml.

<sup>1</sup>Crude model.

<sup>2</sup>P-value for the combined test of the different categories: 0.703

<sup>3</sup>Adjusted for smoking, education, alcohol, coffee, total energy intake, body mass index, physical activity, living alone

<sup>4</sup>P-value for the combined test of the different categories: 0.891

<sup>5</sup>Adjusted for smoking, education, alcohol, coffee, total energy intake, body mass index, physical activity, living alone, fruit and vegetables, vitamin and mineral supplements, and milk

<sup>6</sup>P-value for the combined test of the different categories: 0.853

<sup>7</sup>Adjusted for smoking, education, alcohol, coffee, total energy intake, body mass index, physical activity, living alone, fruit and vegetables, vitamin and mineral supplements, aspirin, milk, and high blood pressure

<sup>8</sup>P-value for the combined test of the different categories: 0.857

<sup>9</sup>Adjusted for smoking, education, alcohol, coffee, total energy intake, body mass index, physical activity, living alone, fruit and vegetables, vitamin and mineral supplements, aspirin, milk, high blood pressure and hormone replacement

<sup>10</sup>P-value for the combined test of the different categories: 0.876

**Table S9.** Association between fermented milk intake and Parkinson's disease among men (n=45 271, cases= 776)

| Glasses* per day | Total N | Cases | Model 1 <sup>1,2</sup><br>HR (95% CI) | Model 2 <sup>3,4</sup><br>HR (95% CI) | Model 3 <sup>5,6</sup><br>HR (95% CI) | Model 4 <sup>7,8</sup><br>HR (95% CI) |
|------------------|---------|-------|---------------------------------------|---------------------------------------|---------------------------------------|---------------------------------------|
| <0.2             | 18873   | 304   | Referent                              | Referent                              | Referent                              | Referent                              |
| 0.2-0.8          | 8246    | 122   | 0.91 (0.74, 1.12)                     | 0.88 (0.71, 1.09)                     | 0.87 (0.70, 1.07)                     | 0.87 (0.70, 1.07)                     |
| 0.8-1.1          | 8988    | 182   | 1.17 (0.97, 1.40)                     | 1.11 (0.92, 1.34)                     | 1.11 (0.92, 1.34)                     | 1.11 (0.92, 1.34)                     |
| >1.1             | 9164    | 168   | 1.06 (0.88, 1.28)                     | 1.03 (0.85, 1.25)                     | 1.03 (0.85, 1.25)                     | 1.03 (0.84, 1.25)                     |

CI, confidence interval; HR, hazard ratio; N, number

\*1 glass = 200 ml.

<sup>1</sup>Crude model.

<sup>2</sup>P-value for the combined test of the different categories: 0.163

<sup>3</sup>Adjusted for smoking, education, alcohol, coffee, total energy intake, body mass index, physical activity, living alone

<sup>4</sup>P-value for the combined test of the different categories: 0.271

<sup>5</sup>Adjusted for smoking, education, alcohol, coffee, total energy intake, body mass index, physical activity, living alone, fruit and vegetables, vitamin and mineral supplements, and milk

<sup>6</sup>P-value for the combined test of the different categories: 0.22

<sup>7</sup>Adjusted for smoking, education, alcohol, coffee, total energy intake, body mass index, physical activity, living alone, fruit and vegetables, vitamin and mineral supplements, aspirin, milk, and high blood pressure

<sup>8</sup>P-value for the combined test of the different categories: 0.221

**Table S10.** Sensitivity analysis for the association of milk intake, excluding those with missing information on milk intake, with Parkinson's disease among women and men (n=71 765, cases=1124). Missing information on fermented milk were replaced with 0 intake. Other covariates were imputed.

| Glasses*<br>per day | Total N | Cases | Model 1 <sup>1,2</sup><br>HR (95% CI) | Model 2 <sup>3,4</sup><br>HR (95% CI) | Model 3 <sup>5,6</sup><br>HR (95% CI) | Model 4 <sup>7,8</sup><br>HR (95% CI) |
|---------------------|---------|-------|---------------------------------------|---------------------------------------|---------------------------------------|---------------------------------------|
| <0.2                | 8030    | 87    | Referent                              | Referent                              | Referent                              | Referent                              |
| 0.2-0.8             | 14848   | 224   | 1.22 (0.95, 1.56)                     | 1.22 (0.95, 1.56)                     | 1.23 (0.96, 1.58)                     | 1.24 (0.96, 1.59)                     |
| 0.8-1.1             | 17917   | 283   | 1.16 (0.91, 1.47)                     | 1.14 (0.90, 1.46)                     | 1.14 (0.90, 1.46)                     | 1.15 (0.90, 1.46)                     |
| 1.1-2.0             | 18206   | 326   | 1.25 (0.98, 1.58)                     | 1.25 (0.98, 1.59)                     | 1.24 (0.97, 1.58)                     | 1.24 (0.98, 1.59)                     |
| >2.0                | 12764   | 204   | 1.11 (0.86, 1.42)                     | 1.13 (0.87, 1.47)                     | 1.11 (0.85, 1.44)                     | 1.12 (0.86, 1.45)                     |

CI, confidence interval; HR, hazard ratio; N, number

\*1 glass = 200 ml.

<sup>1</sup>Adjusted for sex.

<sup>2</sup>P-value for the combined test of the different categories: 0.339.

<sup>3</sup>Adjusted for sex, smoking, education, alcohol, coffee, total energy intake, body mass index, physical activity, living alone.

<sup>4</sup>P-value for the combined test of the different categories: 0.381.

<sup>5</sup>Adjusted for sex, smoking, education, alcohol, coffee, total energy intake, body mass index, physical activity, living alone, fruit and vegetables, vitamin and mineral supplements, yogurt and soured milk.

<sup>6</sup>P-value for the combined test of the different categories: 0.339.

<sup>7</sup>Adjusted for sex, smoking, education, alcohol, coffee, total energy intake, body mass index, physical activity, living alone, fruit and vegetables, vitamin and mineral supplements, aspirin, yogurt and soured milk, and high blood pressure.

<sup>8</sup>P-value for the combined test of the different categories: 0.335.

**Table S11.** Sensitivity analysis for the association of fermented milk intake, excluding those with missing information on fermented milk intake, with Parkinson's disease among women and men (n=60 010, cases=940). Missing information on milk was replaced with 0 intakes. Other covariates were imputed.

| Glasses* per day | Total N | Cases | Model 1 <sup>1,2</sup><br>HR (95% CI) | Model 2 <sup>3,4</sup><br>HR (95% CI) | Model 3 <sup>5,6</sup><br>HR (95% CI) | Model 4 <sup>7,8</sup><br>HR (95% CI) |
|------------------|---------|-------|---------------------------------------|---------------------------------------|---------------------------------------|---------------------------------------|
| <0.2             | 7102    | 117   | Referent                              | Referent                              | Referent                              | Referent                              |
| 0.2-0.8          | 16475   | 218   | 0.71 (0.57, 0.89)                     | 0.70 (0.56, 0.88)                     | 0.68 (0.54, 0.86)                     | 0.69 (0.55, 0.86)                     |
| 0.8-1.1          | 19687   | 325   | 0.83 (0.67, 1.03)                     | 0.80 (0.65, 1.00)                     | 0.80 (0.64, 0.99)                     | 0.80 (0.64, 0.99)                     |
| >1.1             | 16746   | 280   | 0.82 (0.66, 1.01)                     | 0.79 (0.64, 0.99)                     | 0.79 (0.63, 0.98)                     | 0.79 (0.63, 0.99)                     |

CI, confidence interval; HR, hazard ratio; N, number

\*1 glass = 200 ml.

<sup>1</sup>Adjusted for sex.

<sup>2</sup> P-value for the combined test of the different categories: 0.031.

<sup>3</sup>Adjusted for sex, smoking, education, alcohol, coffee, total energy intake, body mass index, physical activity, living alone.

<sup>4</sup> P-value for the combined test of the different categories: 0.027.

<sup>5</sup>Adjusted for sex, smoking, education, alcohol, coffee, total energy intake, body mass index, physical activity, living alone, fruit and vegetables, vitamin- and mineral supplements, and milk.

<sup>6</sup> P-value for the combined test of the different categories: 0.013.

<sup>7</sup>Adjusted for sex, smoking, education, alcohol, coffee, total energy intake, body mass index, physical activity, living alone, fruit and vegetables, vitamin and mineral supplements, aspirin, milk, and high blood pressure.

<sup>8</sup> P-value for the combined test of the different categories: 0.014.

**Table S12.** Sensitivity analysis, excluding the first three years of follow-up, for the association of milk intake with Parkinson's disease among women and men

(n=79 843, cases n=1174).

| Glasses* per day | Total N | Cases | Model 1 <sup>1,2</sup><br>HR (95% CI) | Model 2 <sup>3,4</sup><br>HR (95% CI) | Model 3 <sup>5,6</sup><br>HR (95% CI) | Model 4 <sup>7,8</sup><br>HR (95% CI) |
|------------------|---------|-------|---------------------------------------|---------------------------------------|---------------------------------------|---------------------------------------|
| <0.2             | 17807   | 204   | Referent                              | Referent                              | Referent                              | Referent                              |
| 0.2-0.8          | 14603   | 211   | 1.26 (1.04, 1.53)                     | 1.24 (1.02, 1.50)                     | 1.26 (1.04, 1.54)                     | 1.27 (1.04, 1.54)                     |
| 0.8-1.1          | 17451   | 263   | 1.22 (1.01, 1.46)                     | 1.18 (0.98, 1.42)                     | 1.19 (0.99, 1.43)                     | 1.19 (0.99, 1.43)                     |
| 1.1-2.0          | 17640   | 304   | 1.33 (1.12, 1.59)                     | 1.30 (1.09, 1.56)                     | 1.30 (1.09, 1.56)                     | 1.31 (1.09, 1.57)                     |
| >2.0             | 12342   | 192   | 1.19 (0.97, 1.45)                     | 1.19 (0.97, 1.47)                     | 1.18 (0.96, 1.45)                     | 1.18 (0.96, 1.45)                     |

CI, confidence interval; HR, hazard ratio; N, number

\*1 glass = 200 ml.

<sup>1</sup>Adjusted for a sex

<sup>2</sup>P-value for the combined test of the different categories: 0.03

<sup>3</sup>Adjusted for sex, smoking, education, alcohol, coffee, total energy intake, body mass index, physical activity, living alone

<sup>4</sup>P-value for the combined test of the different categories: 0.066

<sup>5</sup>Adjusted for sex, smoking, education, alcohol, coffee, total energy intake, body mass index, physical activity, living alone, fruit and vegetables, vitamin and mineral supplements, yogurt and soured milk

<sup>6</sup>P-value for the combined test of the different categories: 0.056

<sup>7</sup>Adjusted for sex, smoking, education, alcohol, coffee, total energy intake, body mass index, physical activity, living alone, fruit and vegetables, vitamin and mineral supplements, aspirin, yogurt and soured milk, and high blood pressure

<sup>8</sup>P-value for the combined test of the different categories: 0.055

**Table S13.** Sensitivity analysis, excluding the first three years of follow-up, for the association of fermented milk intake with Parkinson's disease among women and men (n=79 843, cases=1174).

| Glasses* per day | Total N | Cases | Model 1 <sup>1,2</sup><br>HR (95% CI) | Model 2 <sup>3,4</sup><br>HR (95% CI) | Model 3 <sup>5,6</sup><br>HR (95% CI) | Model 4 <sup>7,8</sup><br>HR (95% CI) |
|------------------|---------|-------|---------------------------------------|---------------------------------------|---------------------------------------|---------------------------------------|
| <0.2             | 28128   | 397   | Referent                              | Referent                              | Referent                              | Referent                              |
| 0.2-0.8          | 16164   | 208   | 0.95 (0.81, 1.13)                     | 0.93 (0.79, 1.10)                     | 0.92 (0.78, 1.09)                     | 0.92 (0.78, 1.10)                     |
| 0.8-1.1          | 19244   | 307   | 1.12 (0.97, 1.31)                     | 1.08 (0.93, 1.26)                     | 1.10 (0.94, 1.28)                     | 1.10 (0.94, 1.29)                     |
| >1.1             | 16307   | 262   | 1.10 (0.94, 1.28)                     | 1.08 (0.92, 1.27)                     | 1.09 (0.93, 1.28)                     | 1.09 (0.93, 1.28)                     |

CI, confidence interval; HR, hazard ratio; N, number

\*1 glass = 200 ml.

<sup>1</sup>Adjusted for sex.

<sup>2</sup> P-value for the combined test of the different categories: 0.2.

<sup>3</sup>Adjusted for sex, smoking, education, alcohol, coffee, total energy intake, body mass index, physical activity, living alone

<sup>4</sup> P-value for the combined test of the different categories: 0.296.

<sup>5</sup>Adjusted for sex, smoking, education, alcohol, coffee, total energy intake, body mass index, physical activity, living alone, fruit and vegetables, vitamin- and mineral supplements, and milk.

<sup>6</sup> P-value for the combined test of the different categories: 0.187.

<sup>7</sup>Adjusted for sex, smoking, education, alcohol, coffee, total energy intake, body mass index, physical activity, living alone, fruit and vegetables, vitamin and mineral supplements, aspirin, milk, and high blood pressure.

<sup>8</sup> P-value for the combined test of the different categories: 0.189.

**Table S14.** Association between milk intake and Parkinson's disease among women with time updated information on milk intake in 1987-89 (n= 61424, cases n=540, 1405972 person-years of follow-up).

| Glasses* per day | Model 1 <sup>1,2</sup><br>HR (95 % CI) | Model 2 <sup>3,4</sup><br>HR (95 % CI) | Model 3 <sup>5,6</sup><br>HR (95 % CI) | Model 4 <sup>7,8</sup><br>HR (95 % CI) | Model 5 <sup>9,10</sup><br>HR (95 % CI) |
|------------------|----------------------------------------|----------------------------------------|----------------------------------------|----------------------------------------|-----------------------------------------|
| <0.2             | Referent                               | Referent                               | Referent                               | Referent                               | Referent                                |
| 0.2-0.7          | 1.44 (1.09, 1.91)                      | 1.38 (1.04, 1.83)                      | 1.40 (1.06, 1.86)                      | 1.40 (1.06, 1.86)                      | 1.40 (1.06, 1.86)                       |
| 0.8-1.0          | 1.11 (0.85, 1.44)                      | 1.09 (0.83, 1.42)                      | 1.10 (0.84, 1.43)                      | 1.11 (0.85, 1.44)                      | 1.10 (0.84, 1.43)                       |
| 1.1-2.0          | 1.49 (1.14, 1.94)                      | 1.44 (1.10, 1.90)                      | 1.43 (1.09, 1.88)                      | 1.44 (1.09, 1.90)                      | 1.43 (1.09, 1.89)                       |
| >2.0             | 1.18 (0.87, 1.60)                      | 1.17 (0.86, 1.60)                      | 1.16 (0.85, 1.59)                      | 1.18 (0.86, 1.62)                      | 1.16 (0.85, 1.59)                       |

CI, confidence interval; HR, hazard ratio



\*1 glass =200 ml

<sup>1</sup>Crude model

<sup>2</sup>P-value for the combined test of the different categories: 0.014

<sup>3</sup>Adjusted for smoking, education, alcohol, coffee, total energy intake, body mass index, physical activity, living alone

<sup>4</sup>P-value for the combined test of the different categories: 0.031

<sup>5</sup>Adjusted for smoking, education, alcohol, coffee, total energy intake, body mass index, physical activity, living alone, fruit and vegetables, vitamin and mineral supplements, yogurt and soured milk

<sup>6</sup>P-value for the combined test of the different categories: 0.035

<sup>7</sup>Adjusted for smoking, education, alcohol, coffee, total energy intake, body mass index, physical activity, living alone, fruit and vegetables, vitamin and mineral supplements, aspirin, yogurt and soured milk, and high blood pressure

<sup>8</sup>P-value for the combined test of the different categories: 0.036

<sup>9</sup>Adjusted for smoking, education, alcohol, coffee, total energy intake, body mass index, physical activity, living alone, fruit and vegetables, vitamin and mineral supplements, aspirin, yogurt and soured milk, high blood pressure and hormone replacement

<sup>10</sup>P-value for the combined test of the different categories: 0.035

**Table S15.** Association between fermented milk intake and Parkinson's disease among women with time updated information on fermented milk intake in 1987-89 (n= 61424, cases n=540, 1405972 person-years of follow-up).

| Glasses* per day | Model 1 <sup>1,2</sup><br>HR (95 % CI) | Model 2 <sup>3,4</sup><br>HR (95 % CI) | Model 3 <sup>5,6</sup><br>HR (95 % CI) | Model 4 <sup>7,8</sup><br>HR (95 % CI) | Model 5 <sup>9,10</sup><br>HR (95 % CI) |
|------------------|----------------------------------------|----------------------------------------|----------------------------------------|----------------------------------------|-----------------------------------------|
| <0.2             | Referent                               | Referent                               | Referent                               | Referent                               | Referent                                |
| 0.2-0.8          | 1.06 (0.83, 1.35)                      | 1.00 (0.78, 1.28)                      | 0.97 (0.76, 1.25)                      | 0.97 (0.76, 1.25)                      | 0.97 (0.76, 1.24)                       |
| 0.8-1.1          | 1.08 (0.87, 1.36)                      | 0.97 (0.77, 1.22)                      | 0.98 (0.78, 1.24)                      | 0.98 (0.78, 1.24)                      | 0.97 (0.77, 1.23)                       |
| >1.1             | 1.45 (1.14, 1.84)                      | 1.27 (0.98, 1.63)                      | 1.26 (0.98, 1.63)                      | 1.26 (0.97, 1.62)                      | 1.25 (0.96, 1.61)                       |

CI, confidence interval; HR, hazard ratio

\*1 glass =200 ml

<sup>1</sup>Crude model

<sup>2</sup> P-value for the combined test of the different categories: 0.017

<sup>3</sup>Adjusted for smoking, education, alcohol, coffee, total energy intake, body mass index, physical activity, living alone

<sup>4</sup> P-value for the combined test of the different categories: 0.148

<sup>5</sup>Adjusted for smoking, education, alcohol, coffee, total energy intake, body mass index, physical activity, living alone, fruit and vegetables, vitamin- and mineral supplements, and milk.

<sup>6</sup> P-value for the combined test of the different categories: 0.161

<sup>7</sup>Adjusted for smoking, education, alcohol, coffee, total energy intake, body mass index, physical activity, living alone, fruit and vegetables, vitamin and mineral supplements, aspirin, milk, and high blood pressure.

<sup>8</sup> P-value for the combined test of the different categories: 0.171

<sup>9</sup>Adjusted for smoking, education, alcohol, coffee, total energy intake, body mass index, physical activity, living alone, fruit and vegetables, vitamin and mineral supplements, aspirin, milk, high blood pressure and hormone replacement.

<sup>10</sup>P-value for the combined test of the different categories: 0.184
